# Supplementary material for: Highly Differentiated Human Fetal RPE Cultures Are Resistant to the Accumulation and Toxicity of Lipofuscin-Like Material
Source: PubMed Central journal article supplement — Invest Ophthalmol Vis Sci. 2019 Aug;60(10):3468–79. doi: 10.1167/iovs.19-26690 (PMC6692057; doi:10.1167/iovs.19-26690), 2019-08
Supplement: iovs-60-08-56_s01.pdf [file iovs-60-08-56_s01.pdf]

**Figure S1**

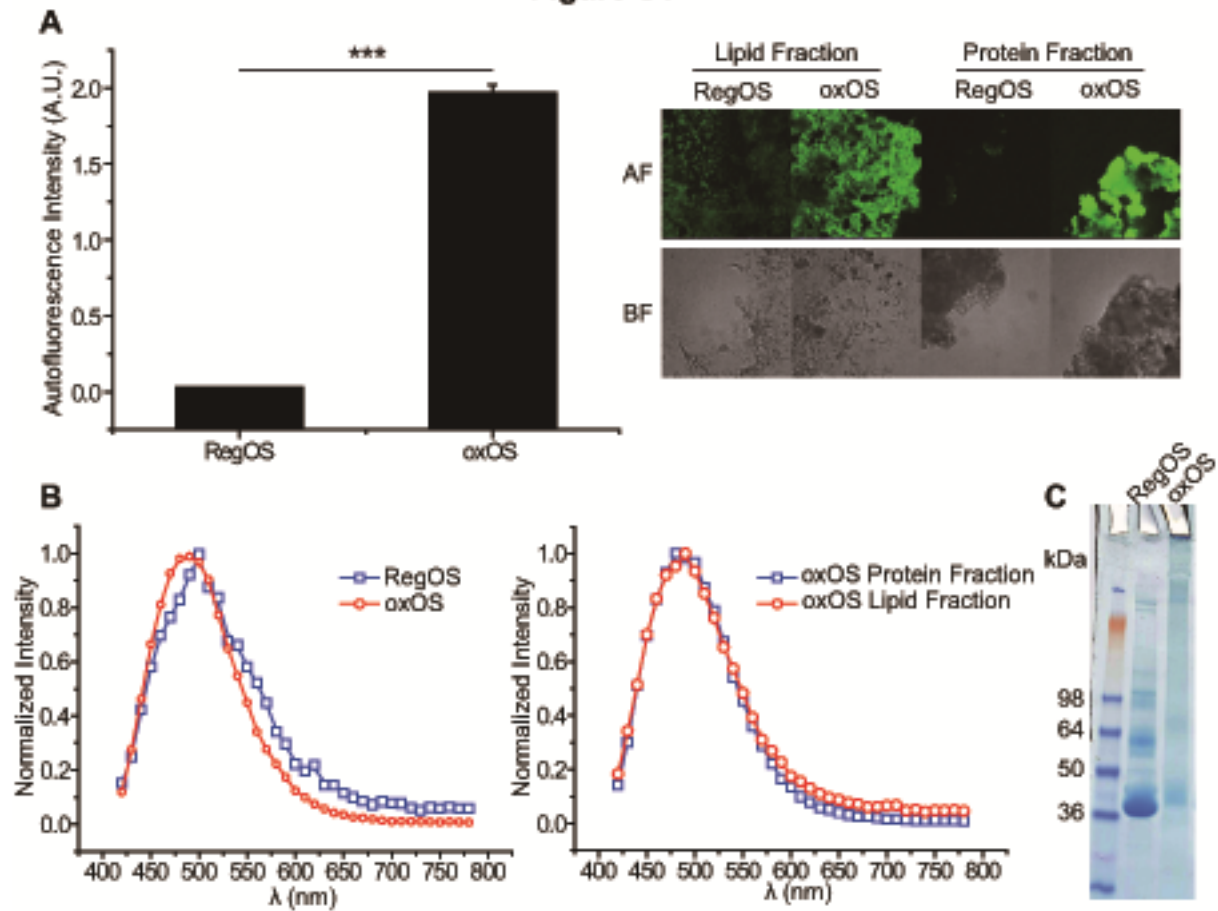

**Figure S1. Characterization of oxOS.** **A)** oxOS are significantly more autofluorescent than RegOS, as assessed by flow cytometry (n=3), and this autofluorescence is distributed across both the lipid and protein fraction of the oxOS. Lipid and protein precipitates from RegOS vs. oxOS viewed by brightfield (BF) and autofluorescence (AF). **B)** Autofluorescence emission spectrum of oxOS is blue-shifted compared to RegOS. Emission spectra of lipid vs. protein fraction of oxOS are identical. 405 nm excitation. **C)** oxOS contains significantly more cross-linked protein compared to RegOS, as assessed by Coomassie staining. Each well was loaded with 20 µg of protein. Left column is ladder. \*\*\* p<0.001.

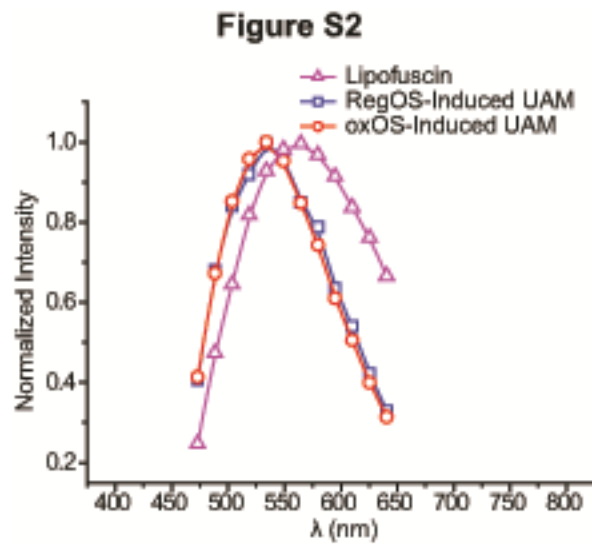

**Figure S2. Emission spectrum of UAM formed from oxOS vs. RegOS.** UAM granules formed in ahRPE from RegOS vs. oxOS had the same emission spectrum (458 nm excitation). This suggests a similar UAM composition despite differences in the chemical constituents of RegOS vs. oxOS. Lipofuscin curve derived from “carry-over” lipofuscin granules in unfed ahRPE cultures.

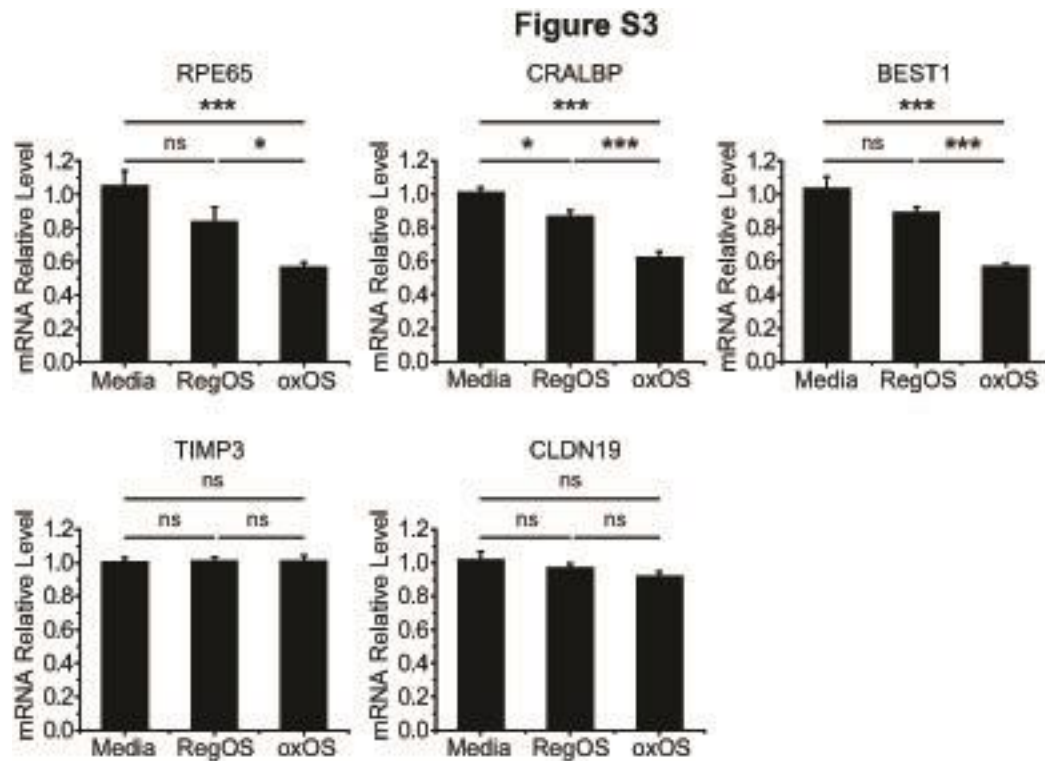

**Figure S3. RPE-enriched gene expression is partly altered in UAM-laden cultures.** Two months after last OS feeding, hRPE cultures fed oxOS and consequently loaded with UAM demonstrated reduced expression of visual cycle proteins RPE65 and CRALBP as well as the RPE-specific membrane channel BEST1. Expression of the RPE-specific tight-junction protein CLDN19 and the ECM protein TIMP3, however, are unchanged. Controls include cultures fed RegOS or Media only. ns=non-significant, \*  $p < 0.05$ , \*\*\*  $p < 0.001$ .
